# Supplementary material for: DAF-12 Regulates a Connected Network of Genes to Ensure Robust Developmental Decisions
Source: PLOS journal article supplement (doi:10.1371/journal.pgen.1002179), 2011-07-21
Supplement: S5 (10.1371/journal.pgen.1002179.s005) [file journal.pgen.1002179.s005]

| Gene          | Phenotype                                                                                   | Reference                 |
|---------------|---------------------------------------------------------------------------------------------|---------------------------|
| <i>dre-1</i>  | Gonad migration                                                                             | (Fielenbach et al., 2007) |
| <i>lin-46</i> | Absence of alae at L4                                                                       | (Hammell et al., 2009)    |
| <i>lin-66</i> | Extra seam cell divisions                                                                   | (Morita and Han, 2006)    |
| <i>ain-1</i>  | Extra seam cell divisions, Protruding and Burst Vulva, extra intestinal cell divisions      | This manuscript           |
| <i>ain-2</i>  | Extra seam cell divisions, synergistic effect on body size                                  | This manuscript           |
| <i>alg-2</i>  | Extra seam cell divisions, extra intestinal cell divisions                                  | This manuscript           |
| <i>cgh-1</i>  | Gaps in alae at L4                                                                          | (Hammell et al., 2009)    |
| <i>nhl-2</i>  | Gaps in alae at L4                                                                          | (Hammell et al., 2009)    |
| <i>nhl-2</i>  | Extra seam cell divisions, extra intestinal cell divisions, synergistic effect on body size | This manuscript           |
